# Supplementary material
Source: publisher site journal article supplement (https://www.dovepress.com/article/548768)
Supplement: Supplementary file 1 [file 548768_supplementary%20files.docx]

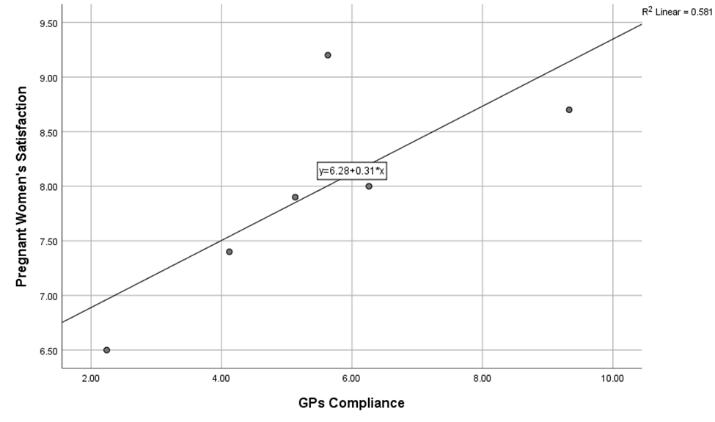


Supplementary Figure S1 Correlation between general practitioners’ (GPs’) compliance with antenatal care (ANC) standards and pregnant women’s satisfaction across six community health centers (CHCs) (r = 0.762, p = 0.078; R² = 0.581).

Supplementary Table 1 Summary of General Practitioners’ Compliance Questionnaire

| Domain | Description | Number of Items | Example Item (s) |
| --- | --- | --- | --- |
| Initial Assessment | Measurement and inquiry regarding maternal condition at first visit (height, weight, Mid Upper Arm Circumference, current health problems). | 6 | I measure the mother’s height during the first antenatal visit. |
| Medical & Risk History | Questions related to medical, behavioral, obstetric, and family history to identify risk factors. | 9 | I ask whether the mother smoked before pregnancy. |
| Immunization Status | Verification of tetanus toxoid (TT) immunization status. | 1 | I ask about the mother’s TT immunization status. |
| Physical Examination – First Trimester | Comprehensive examination of physical signs including conjunctiva, neck, heart, abdomen, extremities. | 9 | I examine the conjunctiva, neck, and heart during the first trimester. |
| Reproductive Organ Examination | Visual inspection and speculum examination of vulva, urethra, vagina, cervix. | 6 | I conduct speculum examination to assess vulva and cervix. |
| Ultrasound Examination – First Trimester | Assessment of gestational sac, Crown Rump Length, fetal heartbeat, fetal position, and Estimated Due Date. | 5 | I check the gestational sac using ultrasound. |
| Infection Screening | Screening for HIV/AIDS, syphilis, and hepatitis B. | 3 | I perform early detection of sexually transmitted infections. |
| Preeclampsia Screening | Blood pressure and urine protein check for early detection of preeclampsia. | 1 | I perform preeclampsia screening during the first trimester. |
| Physical Examination – Third Trimester | Re-examination of vital and physical signs at late pregnancy. | 9 | I check the mother’s blood pressure, abdomen, and extremities during the third trimester. |
| Ultrasound Examination – Third Trimester | Fetal viability, position, growth, placenta, amniotic fluid, and biometric measurements (Biparietal Diameter, Head Circumference, Abdominal Circumference, Femur Length). | 11 | I measure fetal biometry, including BPD, HC, AC, FL, and amniotic fluid volume. |
| Laboratory Examination | Routine ANC laboratory tests (Hb, fasting glucose, 2-hour postprandial glucose). | 3 | I check the mother’s hemoglobin and blood glucose levels. |
| Counseling and Planning | Follow-up consultation, birth planning, contraceptive counseling, and patient education. | 4 | I provide counseling and discuss the birth and contraceptive plans with the mother. |

Supplementary Table 2 Summary of Pregnant Women’s Satisfaction Questionnaire

| Dimension | Description | Number of Items | Example Item (s) |
| --- | --- | --- | --- |
| Tangibles | Physical evidence of care including cleanliness, comfort, and adequacy of facilities and equipment. | 5 | The antenatal examination room is clean, tidy, and comfortable. |
| Reliability | Consistency, accuracy, and dependability of healthcare providers in performing examinations and delivering information clearly. | 5 | The healthcare provider gives clear and accurate information about pregnancy conditions. |
| Responsiveness | Readiness and willingness of healthcare providers to respond promptly and effectively to pregnant women’s needs or complaints. | 5 | The staff is quick to respond when the mother needs assistance |
| Empathy | The extent to which healthcare providers demonstrate care, respect, and individualized attention to pregnant women. | 5 | The staff provides services politely, patiently, and without discrimination. |
| Assurance | Professional competence, safety, and confidence conveyed by healthcare providers during service delivery. | 5 | The staff wears personal protective equipment and ensures privacy during examination. |
| Overall Satisfaction | Overall satisfaction of pregnant women with antenatal care (ANC) services, reflecting key quality dimensions such as timeliness, responsiveness, comfort, and service adequacy. | 5 | Overall, I am satisfied with the ANC services at this community health center. |
| Intention to Revisit | Willingness of pregnant women to return for subsequent ANC visits and recommend the service to others. | 2 | I will come again for the next ANC visit at this health center. |
